# Supplementary material for: Human seasonal influenza under COVID-19 and the potential consequences of influenza lineage elimination
Source: Nat Commun. 2022 Mar 31;13:1721. doi: 10.1038/s41467-022-29402-5 (PMC8971476; doi:10.1038/s41467-022-29402-5)
Supplement: Supplementary file 3 — Supplementary Data 1 [file 41467_2022_29402_MOESM3_ESM.xlsx]

## Sheet: 2018-12~2020-03
Country	A(H1N1)	A(H3N2)	A(HxNx)	B/Yamagata	B/Victoria	B/Undetermined	Total positive by country
United States	45788	20174	303197	630	16202	132600	518591
China	66050	56011	103	430	37131	3077	162802
Canada	13619	7248	50753	0	0	25155	96775
France	4409	4385	26962	12	513	6653	42934
Norway	3445	3125	23989	80	817	5485	36941
Russia	16026	8929	2846	0	9	7937	35747
Spain	6993	5163	12192	0	2	2928	27278
Switzerland	557	438	20707	1	165	2714	24582
Sweden	650	625	18423	0	280	2615	22593
Denmark	2801	2833	12605	7	172	737	19155
Australia	1303	4762	7382	0	0	2055	15502
Japan	7888	4711	19	46	1333	17	14014
Qatar	1413	915	7225	0	0	4098	13651
Mexico	6559	2437	0	771	1856	467	12090
India	6980	3148	0	116	552	606	11402
Portugal	1947	1916	4632	3	190	1616	10304
Italy	3859	4324	678	5	350	931	10147
Austria	690	629	6572	1	114	1209	9215
Iran	3149	1952	2692	0	0	959	8752
Netherlands	362	473	7473	1	18	177	8504
Chile	2245	810	1727	1123	565	1223	7693
Kuwait	1355	558	3361	45	549	1409	7277
Argentina	1856	1423	2803	21	86	644	6833
Slovenia	841	670	4260	0	241	820	6832
Ireland	2260	2602	60	2	121	726	5771
Croatia	735	100	4333	43	43	59	5313
Brazil	2159	912	233	21	341	1120	4786
Israel	1790	454	595	0	1	586	3426
Nepal	1641	720	18	24	63	813	3279
Romania	1154	858	605	0	0	637	3254
Saudi Arabia	1317	0	1053	0	0	810	3180
Turkey	1353	944	0	0	0	843	3140
Serbia	2016	775	103	0	173	54	3121
Poland	1391	108	1495	0	0	82	3076
South Korea	1497	729	0	0	0	788	3014
Egypt	1524	531	0	0	0	876	2931
Estonia	184	43	2443	0	54	162	2886
Lithuania	1272	1056	90	0	150	2	2570
Latvia	298	154	1491	0	100	182	2225
Germany	1014	1033	0	2	137	0	2186
Ukraine	846	441	600	0	0	125	2012
Bangladesh	433	623	9	99	741	0	1905
Mongolia	598	868	92	0	246	99	1903
Thailand	560	464	0	14	776	62	1876
Oman	649	500	42	3	327	218	1739
Singapore	808	388	26	33	402	23	1680
Hungary	497	297	561	6	129	146	1636
Paraguay	1199	88	0	0	0	308	1595
Nicaragua	190	654	132	0	0	593	1569
Colombia	562	498	0	210	0	280	1550
Sri Lanka	535	286	209	0	0	449	1479
Malaysia	498	232	146	0	6	568	1450
Greece	743	528	26	1	72	62	1432
South Africa	222	1046	28	3	20	4	1323
Malta	705	463	0	0	0	109	1277
Ghana	6	977	0	0	219	1	1203
Kazakhstan	543	297	17	1	0	299	1157
Bulgaria	526	508	0	0	111	3	1148
Morocco	553	347	9	0	31	168	1108
New Zealand	5	425	58	0	457	66	1011
Montenegro	138	12	689	0	9	159	1007
Albania	400	125	226	0	180	20	951
Indonesia	435	257	1	3	25	209	930
Luxembourg	305	394	0	0	0	210	909
Belarus	540	319	14	0	0	29	902
Haiti	114	638	16	88	16	2	874
Armenia	569	133	0	0	98	70	870
Myanmar	591	81	0	0	1	150	823
Bhutan	399	135	17	5	245	4	805
Slovakia	363	205	114	0	11	99	792
Iceland	305	321	9	0	124	9	768
Kosovo	24	0	552	0	10	179	765
Ecuador	351	337	0	0	0	69	757
Moldova	475	154	38	0	16	64	747
Bolivia	335	278	5	4	110	0	732
Iraq	367	117	0	0	0	230	714
Philippines	232	190	7	7	209	39	684
Pakistan	436	232	0	0	0	8	676
Macedonia	396	114	64	0	74	25	673
Laos	233	155	0	6	265	8	667
Cuba	305	92	107	2	144	11	661
Senegal	7	394	3	13	222	2	641
Cyprus	65	22	548	0	0	1	636
Costa Rica	261	209	39	5	62	12	588
Czech Republic	264	255	24	0	17	17	577
Togo	12	341	6	0	0	204	563
Lebanon	197	153	0	4	203	0	557
New Caledonia	270	169	2	1	114	1	557
Jamaica	266	202	8	40	19	14	549
Kyrgyzstan	118	163	0	0	0	267	548
Belgium	190	283	32	1	18	2	526
Mauritius	384	97	0	0	0	41	522
Tunisia	279	143	1	0	0	94	517
Madagascar	130	78	20	1	193	84	506
Côte d'Ivoire	68	317	2	10	104	0	501
Panama	354	23	0	28	46	2	453
Guatemala	145	83	42	13	88	62	433
Peru	80	229	1	54	55	4	423
Vietnam	204	26	0	10	55	119	414
Afghanistan	199	130	0	42	42	0	413
Cambodia	184	100	0	16	93	0	393
French Guiana	175	152	2	0	64	0	393
Jordan	243	125	0	0	5	20	393
Cameroon	98	134	4	15	132	8	391
Mali	52	246	0	0	65	0	363
Azerbaijan	17	8	212	0	0	120	357
Honduras	134	139	6	0	5	73	357
Georgia	218	54	0	0	57	2	331
Tanzania	60	193	0	0	0	62	315
Yemen	265	16	13	0	0	17	311
Trinidad and Tobago	256	29	1	8	10	0	304
Martinique	102	181	0	1	16	0	300
Aruba	249	0	0	8	0	25	282
Finland	156	96	0	1	22	0	275
Kenya	110	97	0	0	3	64	274
Bahrain	141	48	0	9	61	7	266
El Salvador	170	9	14	7	48	8	256
Timor-Leste	110	32	0	2	103	0	247
Suriname	177	31	0	1	8	9	226
Fiji	70	22	5	0	42	76	215
Ethiopia	102	16	0	1	0	95	214
Niger	7	129	1	2	56	18	213
Uganda	52	72	6	0	0	64	194
Guadeloupe	91	85	2	0	12	0	190
United Arab Emirates	84	27	0	0	13	59	183
Dominican Republic	79	52	0	37	8	0	176
Algeria	95	26	0	0	28	18	167
Burkina Faso	10	116	0	6	32	0	164
Maldives	50	4	3	1	9	92	159
Guinea	0	111	0	0	38	5	154
Uruguay	93	40	1	4	13	0	151
Mozambique	31	60	14	0	25	1	131
Nigeria	2	63	25	0	4	25	119
Congo	26	33	5	3	32	2	101
Belize	30	16	6	5	37	3	97
Central African Republic	36	5	0	1	45	0	87
Mauritania	14	45	4	0	0	11	74
Barbados	32	15	0	0	9	9	65
Venezuela	19	8	4	3	21	0	55
Rwanda	0	48	0	0	0	2	50
Tajikistan	1	1	8	0	0	26	36
Sudan	13	14	0	0	8	0	35
Seychelles	12	16	2	0	0	2	32
Uzbekistan	10	4	0	0	0	17	31
Sierra Leone	1	18	0	0	0	3	22
Saint Lucia	14	4	2	0	1	0	21
Turks and Caicos Islands	14	2	0	0	4	0	20
Bermuda	10	5	0	0	4	0	19
Papua New Guinea	8	1	1	0	9	0	19
Dominica	16	1	0	0	0	0	17
Saint Kitts and Nevis	9	1	0	1	5	0	16
Cayman Islands	12	1	0	0	0	0	13
Chad	0	10	0	3	0	0	13
Saint Vincent and the Grenadines	5	2	0	0	3	0	10
Turkmenistan	0	0	0	0	4	6	10
Grenada	4	0	0	0	1	0	5
Bahamas	1	0	0	0	3	0	4
Anguilla	1	1	0	0	0	0	2
British Virgin Islands	2	0	0	0	0	0	2
Sum by subtype	247847	168978	538003	4226	69798	220924	1249776
% of total	19.8313	13.5207	43.048	0.338141	5.58484	17.6771

## Sheet: 2020-04~2021-07
Country	A(H1N1)	A(H3N2)	A(HxNx)	B/Yamagata	B/Victoria	B/Undetermined	Total positive by country
China	57	75	13	30	6382	127	6684
United States	170	24	1287	8	21	1680	3190
India	61	455	0	0	3	2	521
Russia	165	64	43	0	0	163	435
Pakistan	0	162	0	0	0	198	360
Bangladesh	0	209	0	0	148	0	357
Ghana	235	29	0	1	26	0	291
Côte d'Ivoire	73	123	0	1	77	0	274
Laos	1	268	0	0	0	0	269
Togo	226	12	0	0	1	3	242
Canada	24	8	82	0	0	126	240
Senegal	0	119	0	0	105	9	233
Haiti	6	0	0	0	200	0	206
South Korea	98	54	0	0	0	48	200
Brazil	41	1	51	0	5	86	184
Vietnam	0	162	0	0	0	0	162
Niger	75	30	29	0	12	10	156
Egypt	40	74	0	0	0	39	153
Kenya	0	55	2	0	0	69	126
Cameroon	54	42	0	0	21	0	117
Saudi Arabia	3	0	2	0	0	112	117
Nepal	0	107	1	0	4	2	114
Cambodia	0	108	0	0	0	0	108
Afghanistan	0	9	0	2	68	0	79
Mexico	4	5	0	1	5	20	35
Sweden	0	8	11	2	5	38	64
Denmark	1	1	27	0	0	30	59
Qatar	0	0	2	0	0	52	54
Uganda	2	48	3	0	0	1	54
Timor-Leste	12	40	0	0	1	0	53
Ukraine	24	1	18	0	0	5	48
Argentina	1	0	24	0	1	20	46
France	1	7	13	0	2	23	46
South Africa	1	1	0	0	34	10	46
Thailand	7	36	0	0	0	3	46
Guinea	1	9	0	0	20	11	41
Colombia	0	0	1	0	2	37	40
Ethiopia	0	10	9	0	0	20	39
Mauritania	1	31	1	0	4	0	37
Switzerland	0	0	23	0	0	15	38
Congo	1	26	5	0	4	1	37
Norway	2	4	9	0	4	18	37
Philippines	0	22	0	0	9	4	35
Netherlands	0	0	29	0	0	2	31
Spain	5	1	11	0	0	12	29
Tanzania	2	8	0	0	0	19	29
Burkina Faso	5	14	0	0	9	0	28
Romania	2	2	1	0	0	19	24
Australia	0	0	17	0	0	6	23
Mali	0	15	1	0	6	0	22
Iran	3	1	1	0	0	10	15
Nigeria	1	0	9	0	0	5	15
Mozambique	8	0	0	0	2	4	14
Chile	0	0	6	0	0	7	13
Slovakia	1	7	4	0	0	1	13
Iraq	1	1	0	0	0	1	3
Nicaragua	0	0	2	0	0	9	11
Oman	0	1	0	0	0	10	11
Portugal	1	1	3	0	0	6	11
Japan	2	4	0	0	4	0	10
Indonesia	0	8	0	0	1	0	9
Sierra Leone	0	0	0	0	2	7	9
United Arab Emirates	0	6	0	0	3	0	9
Honduras	0	0	1	0	0	7	8
Peru	2	1	1	0	4	0	8
Lebanon	1	5	0	0	0	0	6
Sri Lanka	0	0	0	0	0	6	6
Belize	0	0	0	0	4	1	5
Armenia	0	4	0	0	0	0	4
Austria	0	0	0	0	2	2	4
Guatemala	0	0	1	0	0	3	4
Kazakhstan	0	0	0	0	0	4	4
United Kingdom	1	1	0	0	0	2	4
Yemen	0	0	0	0	0	4	4
Algeria	0	0	0	0	3	0	3
Bolivia	2	0	1	0	0	0	3
Germany	0	1	0	0	2	0	3
Iceland	0	0	0	0	2	1	3
Luxembourg	0	0	0	0	0	3	3
Paraguay	0	0	0	0	0	3	3
Poland	0	0	2	0	0	1	3
Estonia	0	0	1	0	0	1	2
Latvia	0	0	2	0	0	0	2
Macedonia	0	0	0	0	0	2	2
Malaysia	1	0	0	0	0	1	2
Panama	0	0	0	0	2	0	2
Singapore	0	0	0	0	0	2	2
Azerbaijan	0	0	0	0	0	1	1
Belgium	0	0	1	0	0	0	1
Bulgaria	0	0	0	1	0	0	1
Finland	0	1	0	0	0	0	1
French Guiana	1	0	0	0	0	0	1
Georgia	0	0	0	0	0	1	1
Lithuania	1	0	0	0	0	0	1
Maldives	0	0	1	0	0	0	1
Slovenia	0	0	0	0	0	1	1
Sum by subtype	1427	2521	1751	46	7210	3146	16101
% of total	8.8628	15.6574	10.8751	0.285697	44.7798	19.5392
