# Supplementary material for: Human seasonal influenza under COVID-19 and the potential consequences of influenza lineage elimination
Source: Nat Commun. 2022 Mar 31;13:1721. doi: 10.1038/s41467-022-29402-5 (PMC8971476; doi:10.1038/s41467-022-29402-5)
Supplement: Supplementary file 4 — Supplementary Data 2 [file 41467_2022_29402_MOESM4_ESM.xlsx]

## Sheet: H3N2
Subtype	Clade	Country	Number of sequences	Earliest detection date
A(H3N2)	3c3.A	Australia	1	2021-05-17
A(H3N2)	A1b/131K	Cambodia	1	2020-04-02
A(H3N2)	A1b/137F	United Arab Emirates	1	2021-02-10
A(H3N2)	A1b/137F	Bangladesh	1	2020-09-19
A(H3N2)	A1b/137F	Laos, People's Democratic Republic	1	2021-02-09
A(H3N2)	A1b/137F	New Zealand	2	2020-12-27
A(H3N2)	A1b/137F	China	9	2020-05-12
A(H3N2)	A1b/186D	France	2	2020-10-21
A(H3N2)	A1b/186D	Ghana	4	2020-11-05
A(H3N2)	A1b/186D	Senegal	4	2020-10-16
A(H3N2)	A1b/186D	Nigeria	5	2020-11-05
A(H3N2)	A1b/186D	Cameroon	5	2020-10-28
A(H3N2)	A1b/186D	Niger	7	2020-12-10
A(H3N2)	A1b/186D	Togo	7	2020-10-02
A(H3N2)	A1b/186D	Congo, the Democatic Republic of	8	2020-11-12
A(H3N2)	A1b/186D	Côte d'Ivoire	16	2020-09-30
A(H3N2)	A1b/94N	Russian Federation	1	2021-05-04
A(H3N2)	A1b/94N	Norway	1	2021-04-14
A(H3N2)	A1b/94N	China	1	2020-04-15
A(H3N2)	A1b/94N	New Zealand	1	2020-04-02
A(H3N2)	A1b/94N	Côte d'Ivoire	1	2020-11-24
A(H3N2)	A1b/94N	Oman	1	2020-10-05
A(H3N2)	A1b/94N	Netherlands	2	2021-02-21
A(H3N2)	A1b/94N	Singapore	3	2021-01-04
A(H3N2)	A1b/94N	Bahrain	4	2021-01-10
A(H3N2)	A1b/94N	Nepal	4	2020-09-27
A(H3N2)	A1b/94N	Japan	7	2020-08-01
A(H3N2)	A1b/94N	Vietnam	7	2020-10-09
A(H3N2)	A1b/94N	Thailand	7	2020-11-09
A(H3N2)	A1b/94N	United States	10	2020-10-12
A(H3N2)	A1b/94N	Sweden	11	2021-01-08
A(H3N2)	A1b/94N	United Arab Emirates	12	2021-01-01
A(H3N2)	A1b/94N	Australia	14	2020-07-16
A(H3N2)	A1b/94N	Timor-Leste	15	2020-07-05
A(H3N2)	A1b/94N	Laos, People's Democratic Republic	21	2020-09-14
A(H3N2)	A1b/94N	Kenya	28	2021-01-15
A(H3N2)	A1b/94N	India	45	2020-08-10
A(H3N2)	A1b/94N	Cambodia	71	2020-07-01
A(H3N2)	A1b/94N	Bangladesh	89	2020-08-09
A(H3N2)	unassigned	Australia	1	2021-01-27

## Sheet: H1N1
Subtype	Clade	Country	Number of sequences	Earliest detection date
A(H1N1)	6b1	Canada	1	2021-05-04
A(H1N1)	6b1.A/156K	India	12	2021-05-04
A(H1N1)	6b1.A/156K	United States	4	2020-04-01
A(H1N1)	6b1.A/156K	Canada	1	2020-04-01
A(H1N1)	6b1.A/156K	South Africa	1	2020-04-01
A(H1N1)	6b1.A/156K	Brazil	1	2020-04-14
A(H1N1)	6b1.A/156K	Ghana	1	2020-11-06
A(H1N1)	6b1.A/156K	China	1	2020-12-01
A(H1N1)	6b1.A/183P-5a	Côte d'Ivoire	2	2020-05-28
A(H1N1)	6b1.A/183P-5a	India	1	2020-04-02
A(H1N1)	6b1.A/183P-5a	Togo	1	2020-04-02
A(H1N1)	6b1.A/183P-5a	Ghana	1	2020-11-03
A(H1N1)	6b1.A/183P-5b	United States	2	2020-09-24
A(H1N1)	6b1.A/183P-5b	Costa Rica	1	2020-06-15
A(H1N1)	6b1.A/183P-5b	Brazil	1	2020-04-01
A(H1N1)	6b1.A/183P-7	Norway	2	2021-01-30
A(H1N1)	6b1.A/187A	Togo	132	2020-10-23
A(H1N1)	6b1.A/187A	Côte d'Ivoire	24	2021-03-29
A(H1N1)	6b1.A/187A	Niger	13	2020-09-16
A(H1N1)	6b1.A/187A	Nigeria	8	2020-11-09
A(H1N1)	6b1.A/187A	United States	4	2021-02-24
A(H1N1)	6b1.A/187A	Ghana	3	2020-11-06
A(H1N1)	6b1.A/187A	Japan	2	2020-10-23
A(H1N1)	6b1.A/187A	Belgium	1	2021-01-20
A(H1N1)	6b1.A/187A	India	1	2021-04-27
A(H1N1)	6b1.A/187A	Mozambique	1	2020-04-20
A(H1N1)	6b1.A/187A	Brazil	1	2020-04-02
A(H1N1)	6b1.A/187A	Bhutan	1	2020-04-04

## Sheet: Victoria
Subtype	Clade	Country	Number of sequences	Earliest detection date
B/Victoria	V1A	China	6	2021-02-01
B/Victoria	V1A	Kenya	5	2021-02-24
B/Victoria	V1A	Sweden	2	2020-04-02
B/Victoria	V1A.3/133R	China	17	2020-04-15
B/Victoria	V1A.3/133R	Kenya	8	2020-09-02
B/Victoria	V1A.3/133R	United States	6	2020-04-03
B/Victoria	V1A.3/133R	Japan	4	2020-04-01
B/Victoria	V1A.3/133R	Brazil	4	2020-04-13
B/Victoria	V1A.3/133R	Haiti	2	2020-04-01
B/Victoria	V1A.3/133R	Romania	1	2020-04-02
B/Victoria	V1A.3/133R	Iceland	1	2020-04-20
B/Victoria	V1A.3/133R	Myanmar	1	2020-07-26
B/Victoria	V1A.3/133R	Guatemala	1	2020-04-02
B/Victoria	V1A.3/133R	Mozambique	1	2020-04-08
B/Victoria	V1A.3/150K	China	474	2020-07-07
B/Victoria	V1A.3/150K	Bangladesh	51	2021-02-23
B/Victoria	V1A.3/150K	Singapore	30	2021-06-02
B/Victoria	V1A.3/150K	South Africa	18	2021
B/Victoria	V1A.3/150K	Afghanistan	12	2020-11-24
B/Victoria	V1A.3/150K	France	8	2020-10-15
B/Victoria	V1A.3/150K	Sweden	8	2021-01-19
B/Victoria	V1A.3/150K	Russia	8	2020-12-22
B/Victoria	V1A.3/150K	Côte d'Ivoire	8	2020-05-28
B/Victoria	V1A.3/150K	Senegal	7	2020-10-10
B/Victoria	V1A.3/150K	Saudi Arabia	6	2020-11-12
B/Victoria	V1A.3/150K	United States	5	2020-12-20
B/Victoria	V1A.3/150K	Kenya	4	2021-05-19
B/Victoria	V1A.3/150K	United Arab Emirates	3	2020-12-15
B/Victoria	V1A.3/150K	Bahrain	2	2021-01-07
B/Victoria	V1A.3/150K	Nigeria	2	2020-11-09
B/Victoria	V1A.3/150K	Niger	2	2020-11-02
B/Victoria	V1A.3/150K	Togo	2	2020-10-04
B/Victoria	V1A.3/150K	Ghana	2	2020-11-03
B/Victoria	V1A.3/150K	Oman	1	2021-01-17
B/Victoria	V1A.3/150K	Spain	1	2021-02-18
B/Victoria	V1A.3/150K	Austria	1	2021-01-09
B/Victoria	V1A.3/150K	Norway	1	2021-01-09
B/Victoria	V1A/165N	China	1	2021-03-01
