# Supplementary material for: Human seasonal influenza under COVID-19 and the potential consequences of influenza lineage elimination
Source: Nat Commun. 2022 Mar 31;13:1721. doi: 10.1038/s41467-022-29402-5 (PMC8971476; doi:10.1038/s41467-022-29402-5)
Supplement: Supplementary file 5 — Supplementary Data 3 [file 41467_2022_29402_MOESM5_ESM.xlsx]

## Sheet: Sheet1
clade	date-first-sample	lineage-duration
V1A.3	2021-02-24	93
V1A.3/150K	2021-04-02	1
V1A.3/150K	2021-02-01	64
V1A.3/150K	2021-03-01	1
V1A.3/150K	2021-01-14	103
V1A.3/150K	2021-01-09	66
V1A.3/150K	2020-06-14	277
V1A.3/150K	2020-11-12	226
V1A.3/150K	2020-06-15	334
V1A.3/133R	2020-12-22	4
V1A.3/133R	2020-05-12	1
V1A.3/133R	2021-03-12	1
V1A.3/133R	2020-06-09	1
V1A.3/133R	2021-04-16	1
V1A.3/133R	2020-05-12	1
V1A.3/133R	2021-03-15	1
V1A.3/133R	2021-02-01	2
V1A.3/133R	2021-03-10	1
V1A.3/133R	2020-07-26	1
V1A.3/133R	2020-10-16	32
V1A.3/133R	2020-09-02	188
V1A.3/133R	2021-05-16	2
V1A.3/133R	2021-02-10	1
6b1.A/183P-7	2021-01-30	26
6b1.A/183P-5b	2020-06-15	1
6b1.A/183P-5b	2020-09-24	37
6b1.A/156K	2021-04-10	1
6b1.A/156K	2021-05-04	65
6b1.A/156K	2020-11-06	1
6b1.A/183P-5a	2020-12-01	1
6b1.A/183P-5a	2020-06-10	1
6b1.A/183P-5a	2020-11-03	1
6b1.A/187A	2020-05-28	1
6b1.A/187A	2021-04-27	1
6b1.A/187A	2021-01-20	1
6b1.A/187A	2021-02-24	48
6b1.A/187A	2020-10-23	1
6b1.A/187A	2021-01-22	60
6b1.A/187A	2020-09-16	256
6b1.A/187A	2020-11-09	145
6b1.A/187A	2021-07-09	1
A1b/137F	2021-02-10	1
A1b/137F	2020-12-27	1
A1b/137F	2021-02-09	1
A1b/137F	2020-06-09	43
A1b/137F	2020-05-12	1
A1b/137F	2020-07-21	1
A1b/137F	2020-09-19	1
A1b/186D	2020-10-02	59
A1b/186D	2020-11-12	62
A1b/186D	2020-11-05	77
A1b/186D	2021-03-01	3
A1b/186D	2020-10-28	49
A1b/186D	2021-05-22	17
A1b/94N	2020-11-24	1
A1b/94N	2021-03-02	1
A1b/94N	2020-07-05	247
A1b/94N	2020-07-16	230
A1b/94N	2020-09-28	1
A1b/94N	2020-08-09	352
3c3.A	2021-05-17	1
